# Supplementary material for: LC-MS/MS Validation Analysis of Trastuzumab Using dSIL Approach for Evaluating Pharmacokinetics
Source: PubMed Central journal article supplement (PMC6274275; doi:10.3390/molecules21111464), 2016-11-02
Supplement: molecules-21-01464-s001.pdf [file molecules-21-01464-s001.pdf]

# Supplementary Materials: LC-MS/MS Validation Analysis of Trastuzumab Using dSIL Approach for Evaluating Pharmacokinetics

Rohit H Budhraja, Milin A. Shah, Mahendra Suthar, Arun Yadav, Sahil P Shah, Prashant Kale, Parisa Asvadi, Mariadhas Valan Arasu, Naif Abdullah Al-Dhabi, Chun Geon Park, Young-Ock Kim, Hak Jae Kim, Y.K. Agrawal and Ravi. K. Krovidi

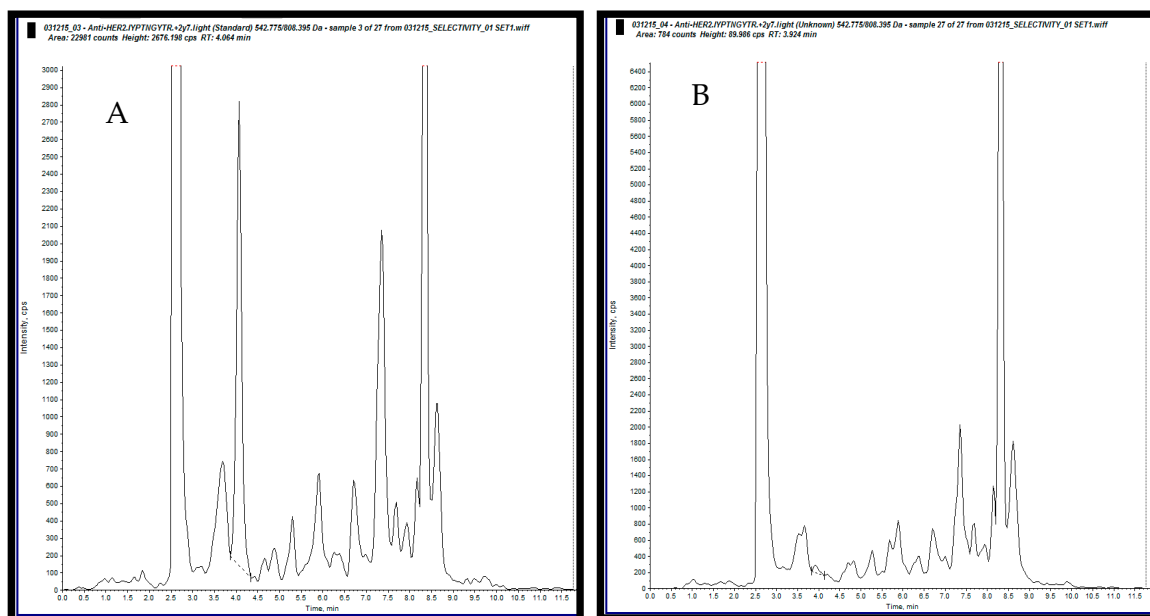

**Figure S1.** Extracted ion chromatograms with the transition for trastuzumab signature peptide (IYPTNGYTR) (A) an LLOQ of 5 µg/mL; (B) Extracted blank plasma.

**Table S1.** Data represents statistics of precision and accuracy results of analyte (Trastuzumab) of three different P&A batches.

| Parameters                | Trastuzumab in Human Plasma ( $\mu\text{g/mL}$ )      |          |           |          |         |         |
|---------------------------|-------------------------------------------------------|----------|-----------|----------|---------|---------|
|                           | Quality Control Samples Id (Prepared from Biosimilar) |          |           |          |         |         |
|                           | DIL QC (1/10)                                         | HQC      | MQC       | LMQC     | LQC     | LOQ QC  |
| P&A I                     | 2314.674                                              | 367.602  | 203.047   | 47.413   | 15.013  | 4.875   |
|                           | 2324.009                                              | 359.434  | 193.510   | 50.546   | 15.170  | 4.550   |
|                           | 2336.139                                              | 372.557  | 204.702   | 46.737   | 13.746  | 4.954   |
|                           | 2324.399                                              | 381.304  | 207.476   | 49.421   | 14.773  | 4.893   |
|                           | 2310.723                                              | 346.703  | 193.750   | 53.974   | 14.586  | 5.347   |
|                           | 2361.571                                              | 385.922  | 201.510   | 55.380   | 14.611  | 5.088   |
| Mean                      | 2328.5858                                             | 368.9203 | 200.6658  | 50.5785  | 14.6498 | 4.9512  |
| SD $\pm$ $\mu\text{g/mL}$ | 18.41830                                              | 14.42897 | 5.79804   | 3.48431  | 0.49802 | 0.26288 |
| Precision (%CV)           | 0.8                                                   | 3.9      | 2.9       | 6.9      | 3.4     | 5.3     |
| Nominal value             | 2450.000                                              | 378.000  | 204.120   | 51.030   | 14.926  | 5.131   |
| Accuracy (%)              | 95.0                                                  | 97.6     | 98.3      | 99.1     | 98.1    | 96.5    |
| n                         | 6                                                     | 6        | 6         | 6        | 6       | 6       |
| P&A II                    | 2148.847                                              | 346.819  | 186.611   | 42.509   | 15.022  | 5.544   |
|                           | 2166.138                                              | 347.109  | 174.232   | 44.819   | 15.623  | 5.270   |
|                           | 2060.092                                              | 368.158  | 194.370   | 51.743   | 15.406  | 5.463   |
|                           | 2101.318                                              | 348.566  | 183.374   | 48.979   | 13.462  | 5.297   |
|                           | 2122.772                                              | 344.791  | 188.950   | 48.290   | 13.614  | 5.541   |
|                           | 2130.259                                              | 347.527  | 192.679   | 43.640   | 15.416  | 5.233   |
| Mean                      | 2121.5710                                             | 350.4950 | 186.7027  | 46.6633  | 14.7572 | 5.3913  |
| SD $\pm$                  | 37.40848                                              | 8.74100  | 7.29604   | 3.56685  | 0.96531 | 0.14109 |
| Precision (%CV)           | 1.8                                                   | 2.5      | 3.9       | 7.6      | 6.5     | 2.6     |
| Nominal value             | 2450.000                                              | 378.000  | 204.120   | 51.030   | 14.926  | 5.131   |
| Accuracy (%)              | 86.6                                                  | 92.7     | 91.5      | 91.4     | 98.9    | 105.1   |
| n                         | 6                                                     | 6        | 6         | 6        | 6       | 6       |
| P&A III                   | 2523.528                                              | 368.223  | 201.997   | 47.888   | 15.584  | 5.020   |
|                           | 2400.532                                              | 359.497  | 189.935   | 51.007   | 14.868  | 4.283   |
|                           | 2523.477                                              | 372.777  | 205.770   | 45.062   | 14.214  | 4.745   |
|                           | 2474.735                                              | 380.563  | 201.321   | 48.534   | 15.338  | 4.333   |
|                           | 2544.001                                              | 340.218  | 192.853   | 52.998   | 15.523  | 4.359   |
|                           | 2434.657                                              | 387.701  | 203.437   | 54.654   | 14.447  | 5.733   |
| Mean                      | 2483.4883                                             | 368.1632 | 199.2188  | 50.0238  | 14.9957 | 4.7455  |
| SD $\pm$                  | 56.93316                                              | 16.80957 | 6.31762   | 3.53983  | 0.57788 | 0.56284 |
| Precision (%CV)           | 2.3                                                   | 4.6      | 3.2       | 7.1      | 3.9     | 11.9    |
| Nominal value             | 2450.000                                              | 378.000  | 204.12000 | 51.03000 | 14.926  | 5.131   |
| Accuracy (%)              | 101.4                                                 | 97.4     | 97.6      | 98.0     | 100.5   | 92.5    |
| n                         | 6                                                     | 6        | 6         | 6        | 6       | 6       |

**Table S2.** Data represents statistics of Matrix effect on analyte (Trastuzumab).

| Parameters               | Matrix           | Quality Control Samples Id                  |               |
|--------------------------|------------------|---------------------------------------------|---------------|
|                          |                  | HQC                                         | LQC           |
|                          |                  | Back-Calculated Values ( $\mu\text{g/mL}$ ) |               |
| Matrix effect            | Normal Serum     | 378.244                                     | <u>11.308</u> |
|                          |                  | 400.897                                     | 12.377        |
|                          |                  | 383.383                                     | 12.782        |
|                          |                  | 355.713                                     | 12.530        |
|                          | Normal Serum     | 365.054                                     | <u>11.750</u> |
|                          |                  | 387.054                                     | <u>11.209</u> |
|                          |                  | 434.353                                     | 12.583        |
|                          |                  | 351.735                                     | 12.089        |
|                          | Normal Serum     | 395.112                                     | 13.338        |
|                          |                  | 423.647                                     | 12.341        |
|                          |                  | 409.468                                     | 13.291        |
|                          |                  | 380.965                                     | 13.316        |
|                          | Normal Serum     | 359.081                                     | <u>11.550</u> |
|                          |                  | 423.037                                     | <u>11.374</u> |
|                          |                  | 413.693                                     | 13.164        |
|                          |                  | 335.534                                     | 13.288        |
|                          | Normal Serum)    | 339.487                                     | <u>10.889</u> |
|                          |                  | 395.453                                     | 12.731        |
|                          |                  | 433.538                                     | 12.843        |
|                          |                  | 392.987                                     | 12.871        |
| Matrix effect (22/03/16) | Normal Serum     | 332.623                                     | 12.387        |
|                          |                  | 412.354                                     | 12.472        |
|                          |                  | 380.048                                     | 13.009        |
|                          |                  | 404.777                                     | 12.820        |
|                          | Lypemic Serum    | 398.760                                     | 13.056        |
|                          |                  | 390.322                                     | <u>11.748</u> |
|                          |                  | 385.010                                     | 13.989        |
|                          |                  | 397.191                                     | 14.114        |
|                          | Lypemic Serum    | 372.180                                     | <u>11.756</u> |
|                          |                  | 388.893                                     | <u>11.854</u> |
|                          |                  | 309.176                                     | 12.389        |
|                          |                  | 394.988                                     | 12.958        |
|                          | Haemolysed Serum | 365.456                                     | <u>11.939</u> |
|                          |                  | 376.558                                     | 12.587        |
|                          |                  | 363.404                                     | 13.711        |
|                          |                  | 397.910                                     | 12.905        |
|                          | Haemolysed Serum | 385.830                                     | <u>10.166</u> |
|                          |                  | 361.026                                     | 12.883        |
|                          |                  | 371.605                                     | 13.150        |
|                          |                  | 397.664                                     | 13.141        |
| Mean                     |                  | 383.6053                                    | 12.5165       |
| SD $\pm$                 |                  | 27.51636                                    | 0.84293       |
| Precision (%CV)          |                  | 7.2                                         | 6.7           |
| Nominal value (ng/mL)    |                  | 378.000                                     | 14.926        |
| Accuracy (%)             |                  | 101.5                                       | 83.9          |
| n                        |                  | 40                                          | 40            |

Note: Underlined values were not within the acceptance range ( $\pm 20\%$  of nominal value for all QCs) but included for the calculation.
